# Supplementary material for: ARID1B as a Potential Therapeutic Target for ARID1A-Mutant Ovarian Clear Cell Carcinoma
Source: MDPI journal article supplement (doi:10.3390/ijms19061710), 2018-06-08
Supplement: s1 [file s1]

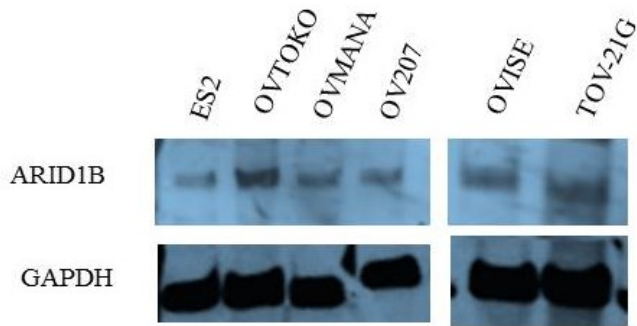

Supplementary Fig. 1. Western blot analysis of ARID1B expression in OCCC cells.

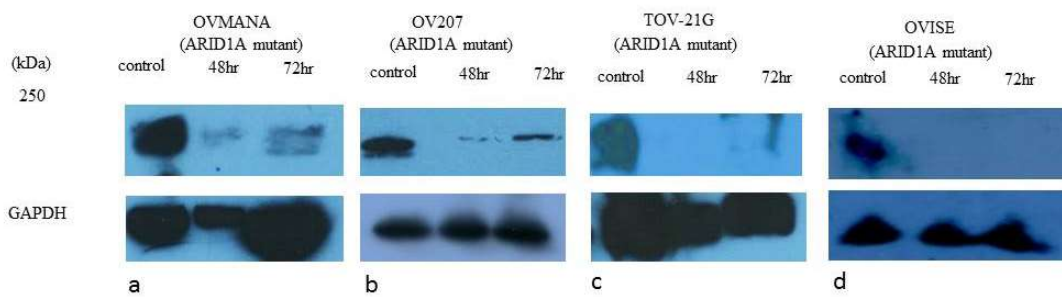

Supplementary Fig. 2. Western blot analysis of ARID1B expression in OCCC cells. ARID1B protein level decreased after siRNA-mediated ARID1B knockdown in ARID1B mutant (a, b, c, d) cells.

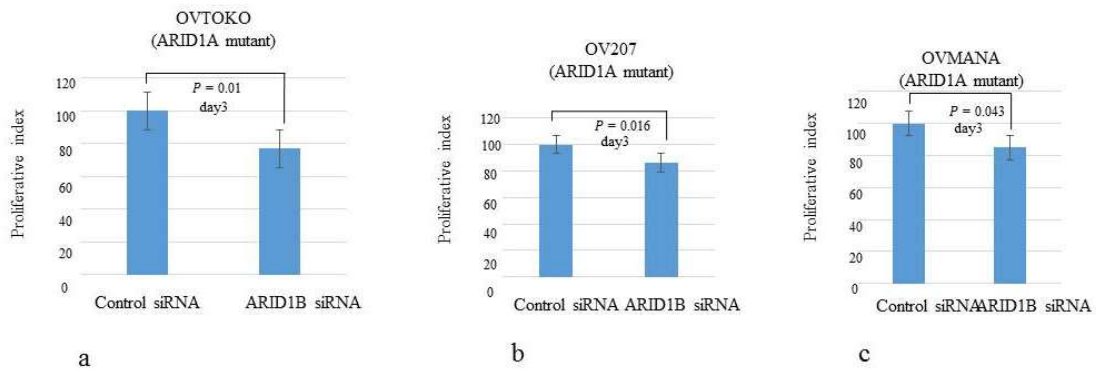

Supplementary Fig. 3. Effect of *ARID1B* knockdown on cell proliferation in OCCC cell lines. *ARID1B* knockdown inhibited proliferation in all *ARID1A*-mutant cell lines (a, b, c)
